# Supplementary material for: Knobloch Syndrome Associated with Novel COL18A1 Variants in Chinese Population
Source: MDPI journal article supplement (doi:10.3390/genes12101512), 2021-09-26
Supplement: s1 [file s1]

Supplementary Table S1: *COL18A1* mutation in patients diagnosed with KS

| Mutations                                | Type            | Race or<br>nationalit<br>y | Gender | Ocular findings |                                 |                                                                                                                     |           |                                                 | Systemic<br>Features       | Reference |
|------------------------------------------|-----------------|----------------------------|--------|-----------------|---------------------------------|---------------------------------------------------------------------------------------------------------------------|-----------|-------------------------------------------------|----------------------------|-----------|
|                                          |                 |                            |        | myopia          | Anterior<br>segment<br>features | Posterior<br>segment<br>features                                                                                    | Others    |                                                 |                            |           |
| IVS1-2A>T                                | Hom             | Brazilian                  | F      | Y               | NA                              | Vitreo-retinal<br>degeneration                                                                                      | None      | NA                                              | Suzuki OT<br>et al.[1]     |           |
| c.355del                                 | Hom             | Saudi                      | M      | Y               | Ectopia lentis                  | Vitreo-retinal<br>atrophy                                                                                           | None      | Encephalocele<br>, epilepsy and<br>mental delay | Khan AO et<br>al.[2]       |           |
| c.355del                                 | Hom             | NA                         | F      | Y               | NA                              | RD related to<br>macular hole<br>Vitreo-retinal<br>degeneration,                                                    | Nystagmus | NA                                              | Alsulaiman<br>SM et al.[3] |           |
| c.1238_1239in<br>s<br>c.3514_3515d<br>el | Compound<br>het | North<br>American          | M      | Y               | NA                              | macular<br>degeneration,<br>retinal<br>detachment<br>Macular<br>pseudocolobo<br>mas and<br>chorioretinal<br>atrophy | None      | NA                                              | Suzuki OT<br>et al.[1]     |           |
| c.1610del                                | Hom             | Belgian                    | M      | Y               | Lens<br>dislocation             |                                                                                                                     | Nystagmus | Occipital bone<br>abnormality                   | Balikova I<br>et al.[4]    |           |
| c.1785_1786d<br>elinsA                   | Hom             | Saudi                      | M      | Y               | Normal                          | Vitreo-retinal<br>atrophy                                                                                           | Exotropia | Focal hair<br>defect                            | Khan AO et<br>al.[2]       |           |

|                                              |                 |           |   |    |                                     |                                |            |                                                        |                         |
|----------------------------------------------|-----------------|-----------|---|----|-------------------------------------|--------------------------------|------------|--------------------------------------------------------|-------------------------|
| c.2437-2A>G<br>c.3213delC                    | Compound<br>het | NA        | M | Y  | Persistent<br>pupillary<br>membrane | Chorioretinal<br>atrophy       | None       | Hypermobile<br>joints                                  | Hull S et<br>al.[5]     |
| c.2658dupC                                   | Het             | NA        | F | Y  | cortical lens<br>opacity            | Choroiretinal<br>atrophy       | None       | Occipital<br>meningocele                               | Hull S et<br>al.[5]     |
| c.2673delC                                   | Hom             | NA        | F | Y  | NA                                  | RD related to<br>macular hole  | None       | NA                                                     | Alsulaiman<br>et al.[3] |
| c.2743C>T                                    | Hom             | Saudi     | M | Y  | Ectopia lentis                      | Vitreo-retinal<br>atrophy      | Nystagmus  | Focal hair<br>defect                                   | Khan AO et<br>al.[2]    |
| c.2797C>T<br>c.3213dupC                      | Compound<br>het | NA        | M | NA | NA                                  | NA                             | Nystagmus  | Cysts                                                  | Thau A et<br>al.[6]     |
| c.2960_2969d<br>up<br>c.3514_3515d<br>el     | Hom             | Belgian   | F | Y  | Normal                              | Chorioretinal<br>atrophy       | Nystagmus  | Occipital<br>meningoen<br>cephalocele                  | Balikova I<br>et al.[4] |
| c.2969_2978d<br>el10<br>c.1187_1200d<br>up14 | Hom             | NA        | M | NA | NA                                  | NA                             | Strabismus | Focal<br>alopecia, otitis<br>media and<br>constipation | Thau A et<br>al.[6]     |
| c.2969_2978d<br>el<br>c.3514_3515d           | Compound<br>het | Brazilian | F | Y  | NA                                  | Vitreo-retinal<br>degeneration | None       | NA                                                     | Suzuki OT<br>et al.[1]  |

---

el

|                      |     |           |   |   |                                            |                                                        |                         |                                       |                       |
|----------------------|-----|-----------|---|---|--------------------------------------------|--------------------------------------------------------|-------------------------|---------------------------------------|-----------------------|
| c.2970_2971delAGinsC | Hom | Hispanic  | M | Y | Normal                                     | BE:<br>chorioretinal atrophy, RE:<br>RD                | Nystagmus               | Polymicrogyria                        | White RJ et al.[7]    |
| c.3213dupC           | Hom | NA        | F | Y | NA                                         | Chorioretinal atrophy and atrophic macular patches, RD | Nystagmus and esotropia | Bifrontal polymicrogyria              | Gradstein L et al.[8] |
| c.3213dupC           | Hom | NA        | F | Y | Cortical lens opacity and lens subluxation | Chorioretinal atrophy                                  | None                    | Unilateral duplex kidney/bifid ureter | Hull S et al.[5]      |
| c.3277C>T            | Hom | Brazilian | M | Y | NA                                         | Vitreo-retinal degeneration, retinal detachment        | None                    | Epilepsy                              | Suzuki OT et al.[1]   |
| c.3356_3357insT      | Hom | NA        | M | Y | Normal                                     | Chorioretinal atrophy and RD                           | NA                      | Midline occipital defect, congenital  | Hull S et al.[5]      |

---

|                             |              |                |   |   |                                            |                                                 |      |                                                                                                                            |                     |
|-----------------------------|--------------|----------------|---|---|--------------------------------------------|-------------------------------------------------|------|----------------------------------------------------------------------------------------------------------------------------|---------------------|
| c.3459dupC                  | Hom          | NA             | M | Y | cortical lens opacity and lens subluxation | Chorioretinal atrophy                           | None | hydronephrosis and hypermobile joints<br>Midline occipital defect and learning difficulties                                | Hull S et al.[5]    |
| c.3514_3515del<br>c.2105del | Compound het | North American | M | Y | NA                                         | Vitreo-retinal degeneration, retinal detachment | None | NA                                                                                                                         | Suzuki OT et al.[1] |
| c.3514_3515delCT            | Hom          | El Salvadorian | F | Y | NA                                         | Chorioretinal atrophy                           | None | Occipital dermal sinus tract, frontal cortical dysplasia, white matter loss, mild ventriculomegaly and developmental delay | Mahajan VB [9]      |

|                    |     |         |   |    |                           |                                                           |                         |                                               |                              |
|--------------------|-----|---------|---|----|---------------------------|-----------------------------------------------------------|-------------------------|-----------------------------------------------|------------------------------|
| c.3514_3515delCT   | Hom | Saudi   | M | Y  | Ectopia lentis            | Vitreo-retinal atrophy                                    | Nystagmus               | None                                          | Khan AO et al.[2]            |
| c.3514_3515delCT   | Hom | NA      | M | NA | NA                        | NA                                                        | Nystagmus               | Dermal sinus                                  | Thau A et al.[6]             |
| c.3825_3838del     | Hom | Iranian | F | Y  | Normal                    | Chorioretinal atrophy and macula lesion                   | Nystagmus and esotropia | NA                                            | Haghighi A [10]              |
| c.4054_4055del     | Hom | NA      | F | Y  | NA                        | RD related to macular hole                                | Nystagmus               | NA                                            | Alsulaiman et al.[3]         |
| c.4063_64delCT     | Hom | NA      | M | Y  | Poor pupillary dilatation | Chorioretinal atrophy and RD                              | None                    | Epilepsy and developmental delay              | Hull S et al.[5]             |
| c.4063_64 delCT    | Hom | NA      | F | Y  | NA                        | Chorioretinal atrophy                                     | Glaucoma                | Occipital bone defect                         | Wawrzynski J et al. [11]     |
| c.4173G>A          | Hom | NA      | F | N  | Poor pupillary dilatation | RE:Chorioretinal atrophy, LE:RD and macular hole          | None                    | Occipital encephalocele                       | Hull S et al.[5]             |
| c.4224_4225delinsC | Hom | Chilean | F | Y  | NA                        | NA                                                        | Strabismus              | Sinus pericranii                              | Nakousi-Capurro N et al.[12] |
| c.4259-28_4265del  | Hom | NA      | M | Y  | Normal                    | Peripapillary atrophy, leopard fundus and macular atrophy | Strabismus              | Scalp defect region and occipital bone defect | Wang P et al.[13]            |

|                                  |                   |         |   |   |                       |                                                                                                     |                                |                                                                                       |                          |
|----------------------------------|-------------------|---------|---|---|-----------------------|-----------------------------------------------------------------------------------------------------|--------------------------------|---------------------------------------------------------------------------------------|--------------------------|
| c.4269_4287del<br>c.4194_4221del | Compound<br>heter | Jewish  | F | Y | Irregular<br>pupil    | Albinotic<br>fundus                                                                                 | None                           | Normal                                                                                | Levinger N<br>et al.[14] |
| c.4290_4299del                   | Hom               | NA      | M | Y | Normal                | Peripapillary<br>atrophy,<br>leopard fundus<br>and macular<br>atrophy                               | Strabismus                     | Scalp defect<br>region                                                                | Wang P et<br>al.[13]     |
| c.4492delG                       | Hom               | Belgian | F | Y | Absent iris<br>crypts | BE:<br>Chorioretinal<br>atrophy, LE:<br>RD                                                          | NA                             | Congenital<br>hip<br>subluxation<br>and<br>developmental<br>delay                     | Balikova I<br>et al.[4]  |
| c.4759_4760del                   | Hom               | NA      | M | Y | cataract              | Peripapillary<br>atrophy,<br>leopard fundus<br>and macular<br>atrophy                               | Nystagmus<br>and<br>strabismus | Scalp defect<br>region                                                                | Wang P et<br>al.[13]     |
| c.4759_4760delCT                 | Hom               | Chinese | F | Y | cataract              | Myopic fundus<br>and macular<br>degeneration<br>Chorioretinal<br>atrophy and<br>macular<br>coloboma | None                           | Bilateral<br>frontal gyrus<br>dysplasia<br>Occipital<br>meningocele<br>polymicrogyria | Zhang LS et<br>al.[15]   |
| c.4759_4760delCT                 | Hom               | Arab    | M | Y | Cataract              |                                                                                                     | None                           |                                                                                       | Levinger N<br>et al.[14] |

|            |     |      |   |   |        |                                                     |      |                                                 |                          |
|------------|-----|------|---|---|--------|-----------------------------------------------------|------|-------------------------------------------------|--------------------------|
| c.4164dupC | Hom | Arab | F | Y | Normal | Chorioretinal<br>atrophy and<br>macular<br>coloboma | None | Atretic<br>meningocele<br>and<br>polymicrogyria | Levinger N<br>et al.[14] |
|------------|-----|------|---|---|--------|-----------------------------------------------------|------|-------------------------------------------------|--------------------------|

Hom, homozygous; Het, heterozygous; NA, not available; F, female; M, male; Y, yes; BE, both eyes; RE, right eye; LE, left eye; RD, retinal detachment.

1. Suzuki OT, Sertie AL, Der Kaloustian VM, et al. Molecular analysis of collagen XVIII reveals novel mutations, presence of a third isoform, and possible genetic heterogeneity in Knobloch syndrome. *Am J Hum Genet* 2002;71(6):1320-9.
2. Khan AO, Aldahmesh MA, Mohamed JY, et al. The distinct ophthalmic phenotype of Knobloch syndrome in children. *Br J Ophthalmol* 2012;96(6):890-5.
3. Alsulaiman SM, Al-Abdullah AA, Alakeely A, et al. Macular Hole-Related Retinal Detachment in Children with Knobloch Syndrome. *Ophthalmol Retina* 2020;4(5):498-503.
4. Balikova I, Sanak NS, Fanny D, et al. Three cases of molecularly confirmed Knobloch syndrome. *Ophthalmic Genet* 2020;41(1):83-7.
5. Hull S, Arno G, Ku CA, et al. Molecular and Clinical Findings in Patients With Knobloch Syndrome. *JAMA Ophthalmol* 2016;134(7):753-62.
6. Thau A, Tsukikawa M, Wangtiraumnay N, et al. Optical Coherence Tomography in Knobloch Syndrome. *Ophthalmic Surg Lasers Imaging Retina* 2019;50(8):e203-e10.
7. White RJ, Wang Y, Tang P, Montezuma SR. Knobloch syndrome associated with Polymicrogyria and early onset of retinal detachment: two case reports. *BMC Ophthalmol* 2017;17(1):214.
8. Gradstein L, Hansen RM, Cox GF, et al. Progressive retinal degeneration in a girl with Knobloch syndrome who presented with signs of ocular albinism. *Doc Ophthalmol* 2017;134(2):135-40.
9. Mahajan VB, Olney AH, Garrett P, et al. Collagen XVIII mutation in Knobloch syndrome with acute lymphoblastic leukemia. *Am J Med Genet A* 2010;152A(11):2875-9.
10. Haghighi A, Tiwari A, Piri N, et al. Homozygosity mapping and whole exome sequencing reveal a novel homozygous COL18A1 mutation causing Knobloch syndrome. *PLoS One* 2014;9(11):e112747.
11. Wawrzynski J, Than J, Gillam M, Foster PJ. Acute Angle Closure in Knobloch Syndrome. *J Glaucoma* 2021;30(5):e265-e8.

12. Nakousi-Capurro N, Huserman J, Castillo S, et al. Knobloch syndrome in a patient from Chile. *Am J Med Genet A* 2020;182(10):2239-42.
13. Wang P, Jia X, Xiao X, et al. An Early Diagnostic Clue for COL18A1- and LAMA1-Associated Diseases: High Myopia With Alopecia Areata in the Cranial Midline. *Front Cell Dev Biol* 2021;9:644947.
14. Levinger N, Hendler K, Banin E, et al. Variable phenotype of Knobloch syndrome due to biallelic COL18A1 mutations in children. *Eur J Ophthalmol* 2020:1120672120977343.
15. Zhang LS, Li HB, Zeng J, et al. Knobloch syndrome caused by homozygous frameshift mutation of the COL18A1 gene in a Chinese pedigree. *Int J Ophthalmol* 2018;11(6):918-22.
